# Supplementary material for: Bioactivity Profiling of Daedaleopsis confragosa (Bolton) J. Schröt. 1888: Implications for Its Possible Application in Enhancing Women’s Reproductive Health
Source: MDPI journal article supplement (doi:10.3390/ph17050600), 2024-05-08
Supplement: s1 [file s1]

**Table S1.** Extraction yield of *D. confragosa* analyzed EtOH extracts.

| Sample                         | Yield of Extracts | Extraction |
|--------------------------------|-------------------|------------|
|                                | g/10 g d.w.       | % (w/w)    |
| <i>D. confragosa</i> (DC)      | 0.31 ± 0.05       | 3.09       |
| <i>D. confragosa</i> HD (DCHD) | 0.006 ± 0.05      | 0.63       |

HD - this extract is prepared using the hydrodistillation technique. The data is presented as the mean ± standard deviation of triplicate measurements.

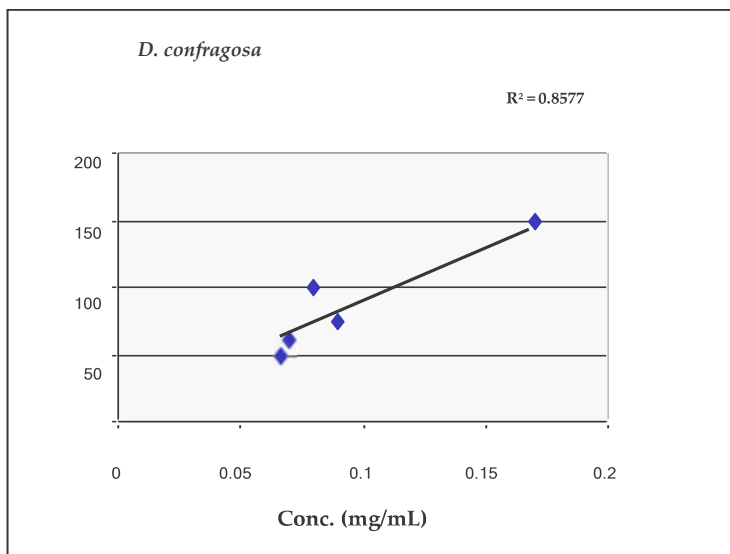

**Figure S1.** Dependence of the reciprocal value of the hemolysis rate  $1/t_{0.5}$  (min) on the extract concentration (mg/mL).
